# Supplementary material
Source: publisher figshare collection journal article supplement (https://sage.figshare.com/ndownloader/files/13158506)
Supplement: Supplementary file 1 [file 13158506]

## Appendix 1

The functional form of  $D_k(j)$ :

For  $k=1$ ,

$$D_1(j) = \beta(t_0(j)) \left\{ \sum_{i=1}^{j-1} \int_{x_{i-1}}^{x_i} w(x) Q_x^*(t_0 - x) dx + \int_{x_{j-1}}^{t_0(j)} w(x) Q_x^*(t_0 - x) dx \right\},$$

for  $k=2$ ,

$$D_2(j) = \beta(t_1(j)) \left[ 1 - \beta(t_0(j)) \left\{ \sum_{i=1}^{j-1} \int_{x_{i-1}}^{x_i} w(x) Q_x^*(t_1 - x) dx + \int_{x_{j-1}}^{t_0(j)} w(x) Q_x^*(t_1 - x) dx \right\} \right. \\ \left. + \int_{t_0}^{t_1} w(x) Q_{t_0(j)}(t_1 - x) dx \right],$$

for  $k \geq 3$ ,

$$D_k(j) = \beta(t_{k-1}(j)) \left[ \sum_{i=1}^{k-2} \left\{ \prod_{l=i}^{k-2} (1 - \beta(t_l(j))) \right\} \int_{t_{i-1}}^{t_i} w(x) Q_{t_{i-1}(j)}(t_{k-1} - x) dx + \right. \\ \left. \int_{t_{k-2}}^{t_{k-1}} w(x) Q_{t_{k-2}(j)}(t_{k-1} - x) dx + \prod_{l=0}^{k-2} (1 - \beta(t_l(j))) \left\{ \sum_{i=1}^{j-1} \int_{x_{i-1}}^{x_i} w(x) Q_x^*(t_{k-1} - x) dx + \right. \right. \\ \left. \left. \int_{x_{j-1}}^{t_0(j)} w(x) Q_x^*(t_{k-1} - x) dx \right\} \right]$$

where  $Q_x^*(\cdot)$  is survival distribution of sojourn time in  $S_p$  at age  $x < t_0(j)$ . In simulation, we set parameters of  $Q_x^*(\cdot)$  to a known constant values when calculating  $D_k(j)$ . Since  $\Delta_k \leq \delta_j$  for all  $k$ , and  $j \in \{k = 1, \dots, K - 1, \text{ and } j = 1, 2, \dots, g\}$ , the participants who belong to  $j$ th aged group at entry time is divided into at most two age groups at each examination time. Thus, the survival distribution of sojourn time in  $S_p$  at the  $i$ th examination in the  $j$ th age group is redefined as follows:

$$Q_{t_{i-1}(j)}(t) = \begin{cases} Q_s(t) & \text{if } t_{i-1}(j) \in A_s \\ Q_{s+1}(t) & \text{if } t_{i-1}(j) \in A_{s+1} \end{cases} \quad \text{and} \quad \beta(t_l(j)) = \begin{cases} \beta_s & \text{if } t_l(j) \in A_s \\ \beta_{s+1} & \text{if } t_l(j) \in A_{s+1} \end{cases},$$

where  $Q_s(t)$  denotes the survival distribution with mean  $\mu_s$ .

The functional form of  $I_k(j)$ :

For  $k=1$ ,

$$I_1(j) = (1 - \beta(t_0(j))) \left\{ \sum_{i=1}^{j-1} \int_{x_{i-1}}^{x_i} w(x) (Q_x^*(t_0 - x) - Q_x^*(t_1 - x)) dx \right. \\ \left. + \int_{x_{j-1}}^{t_0(j)} w(x) (Q_x^*(t_0 - x) - Q_x^*(t_1 - x)) dx \right\} + \int_{t_0}^{t_1} w(x) (1 - Q_{t_0(j)}(t_1 - x)) dx,$$

for  $k > 1$ ,

$$I_k(j) = \left[ \prod_{l=0}^{k-1} (1 - \beta(t_l(j))) \right] \left\{ \sum_{i=1}^{j-1} \int_{x_{i-1}}^{x_i} w(x) (Q_x^*(t_{k-1} - x) - Q_x^*(t_k - x)) dx \right. \\ \left. + \int_{x_{j-1}}^{t_0(j)} w(x) (Q_x^*(t_{k-1} - x) - Q_x^*(t_k - x)) dx \right\} \\ + \sum_{i=1}^{k-1} \prod_{l=i}^{k-1} (1 - \beta(t_l(j))) \int_{t_{i-1}}^{t_i} w(x) (Q_{t_{i-1}(j)}(t_{k-1} - x) - Q_{t_{i-1}(j)}(t_k - x)) dx \\ + \int_{t_{k-1}}^{t_k} w(x) \{1 - Q_{t_{k-1}(j)}(t_k - x)\} dx \Bigg].$$

Here,  $Q_x^*(\cdot)$ ,  $Q_{t_{i-1}(j)}(\cdot)$  and  $\beta(t_l(j))$  defined the same as *the functional form of  $D_k(j)$* .
